# Supplementary material for: IMB-T130 targets 3-dehydroquinate synthase and inhibits Mycobacterium tuberculosis
Source: PubMed Central journal article supplement (PMC6262012; doi:10.1038/s41598-018-35701-z), 2018-11-28
Supplement: 41598_2018_35701_MOESM1_ESM.pdf [file 41598_2018_35701_MOESM1_ESM.pdf]

1           **IMB-T130 targets 3-dehydroquinate synthase and inhibits**

2                           ***Mycobacterium tuberculosis***

3   **Ningyu Zhu<sup>1†</sup>, Xia Wang<sup>1†</sup>, Dongsheng Li<sup>1</sup>, Yuan Lin<sup>2</sup>, Xuefu You<sup>1</sup>, Jiandong Jiang<sup>1, 2</sup>,**

4   **Yanni Xu<sup>1</sup>, Wei Jiang<sup>1\*‡</sup>, Shuyi Si<sup>1\*‡</sup>**

5   <sup>1</sup>*Beijing Key Laboratory of Antimicrobial Agents, Institute of Medicinal Biotechnology,*

6   *Peking Union Medical College and Chinese Academy of Medical Sciences, Beijing,*

7   *100050 China; <sup>2</sup>State Key Laboratory of Bioactive Substances and Function of Natural*

8   *Medicine, Institute of Materia Medica, Chinese Academy of Medical Sciences and*

9   *Peking Union Medical College, Beijing 100050, China*

10   \*Corresponding author: Tel: +86-10-63180604; Fax: +86-10-63180604; E-mail:

11   sisyimb@hotmail.com

12

13 **Supplementary materials**

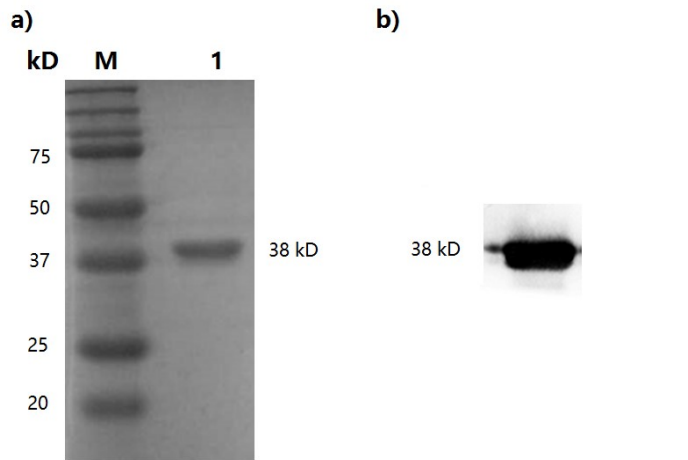

14

15 **Supplementary Figure 1** Expression and purification of *M. tuberculosis* DHQS. a) Protein

16 samples were separated by SDS-PAGE and the bands were visualised by Coomassie blue

17 staining. Lane M, protein marker. Lane 1, purified His-tagged *MtDHQS*. b) Expression of the

18 His-tagged *MtDHQS* protein detected by western blotting with an anti-His antibody.

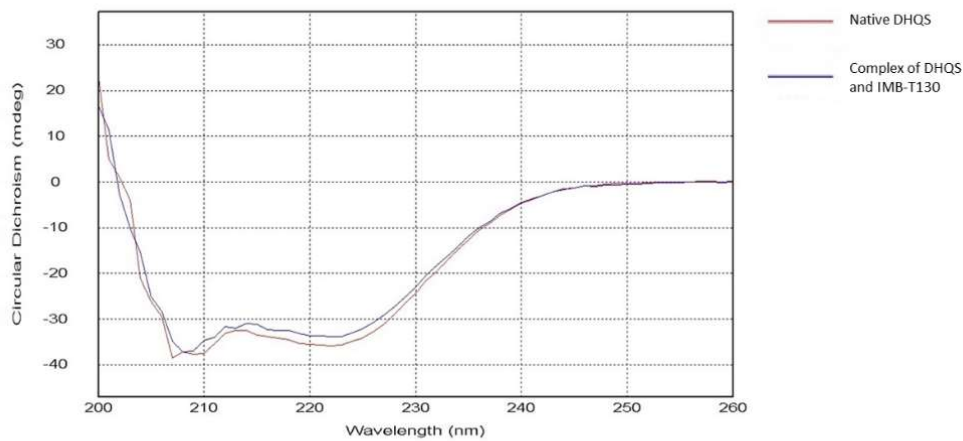

19

20 **Supplementary Figure 2** Superimposed CD spectra of the native protein and DHQS

21 complexed with IMB-T130.
